# Supplementary material
Source: HighWire-hosted journal article supplement (https://www.rcpjournals.org/highwire/filestream/8497/field_highwire_adjunct_files/2/Shah_supp_file_3.pdf)

Days between incidents of physical violence across the 3 wards – T chart

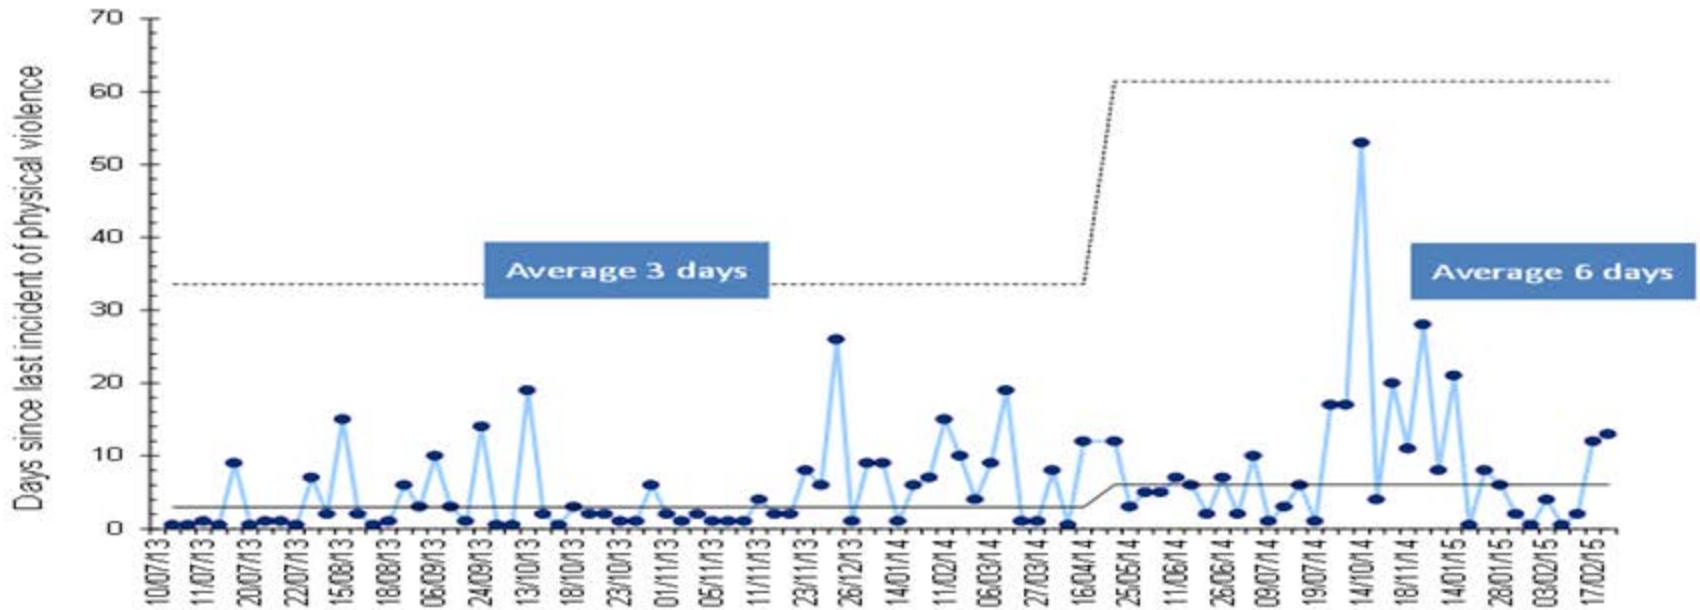

Days between staff injury due to physical violence (all three wards) - T Chart

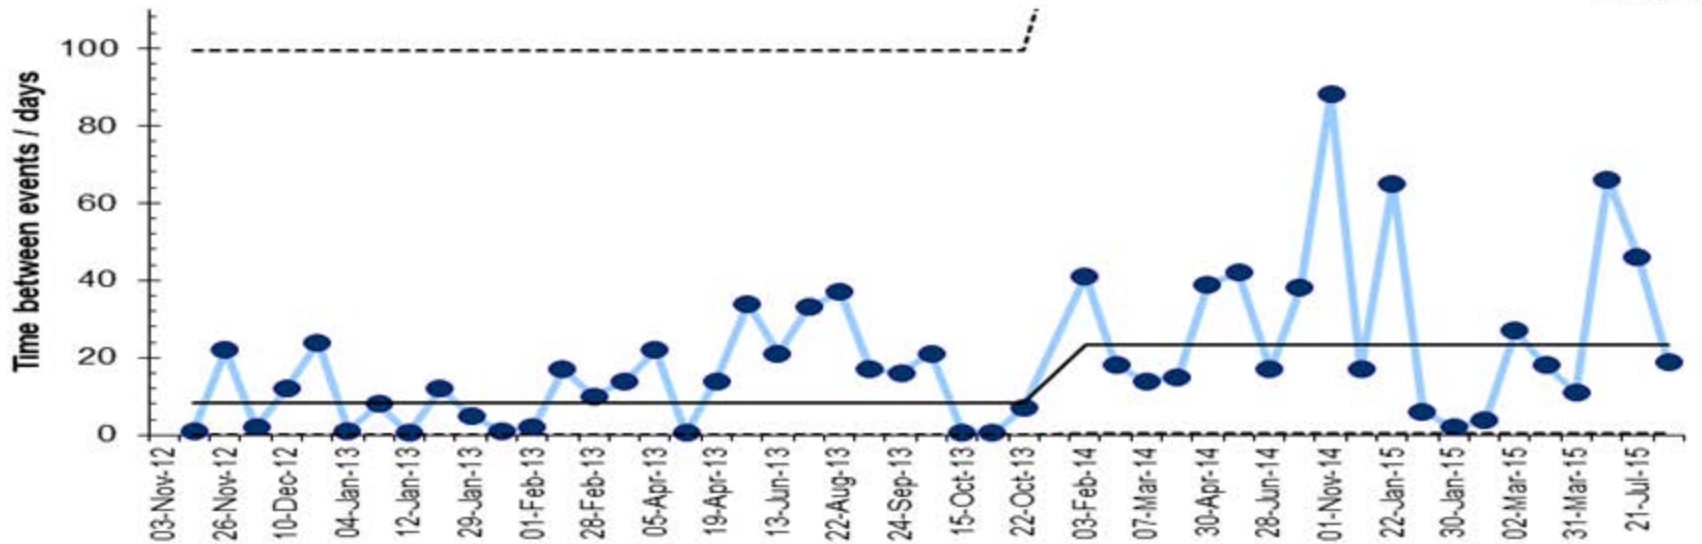

Supplement: Shah_supp_file_3.pdf [file Shah_supp_file_3.pdf]
